# Supplementary material for: De Novo Transcriptome Sequencing and Analysis for Venturia inaequalis, the Devastating Apple Scab Pathogen
Source: PLoS One. 2013 Jan 17;8(1):e53937. doi: 10.1371/journal.pone.0053937 (PMC3547962; doi:10.1371/journal.pone.0053937)
Supplement: File S4 — Effect of k-mer size on assembling performance of transcriptome using Velvet, SOAPdenovo and ABySS. (XLS) [file pone.0053937.s004.xls]

## Sheet: Sheet1
Table S4: Effect of k-mer size on assembling performance of transcriptome using Velvet, SOAPdenovo and ABySS
Assembly using Velvet at different k-mers
K-mer	Total Transcripts (>100)	Max Length	Average Length	Average Coverage	Transcripts (Length >1000)	% transcripts (>1000)	Total-length (bp)	N50 (bp)
19	68552	5936	411.32	102.13	6293	9.179	28196860	671
21	47327	13438	570.85	110.97	8049	17.007	27016871	1343
23	40158	13806	637.94	121.74	7945	19.784	25618264	1603
25	35305	15433	689.53	138.78	7789	22.062	24344019	1762
27	30951	20907	745.35	154.73	7597	24.545	23069369	1881
29	26678	20909	814.96	170.06	7333	27.64	21741489	1979
31	24943	20825	844.2	181.6	7292	29.23	21056922	2008
33	21639	20789	900.14	202.72	6941	32.076	19478185	2034
35	20987	16324	907.53	210.5	6922	32.98	19046399	1969
37	18872	14040	943.58	231.86	2249	35.232	17807167	1909
39	16992	12273	960.63	265.81	6276	36.94	16322977	1817
41	18029	9859	854.14	264.63	5747	31.876	15399277	1547
43	18083	9128	739.81	281.14	4644	25.682	13378145	1260
45	20422	7459	519.3	278.82	2686	13.152	10605148	792
47	17050	5335	333.99	347.13	718	4.211	5694597	389
Assembly using SOAPdenovo at different k-mers
K-mer	Total Transcripts (>100)	Max Length	Average Length	Average Coverage	Transcripts (Length >1000)	% transcripts (>1000)	Total-length (bp)	N50 (bp)
19	73891	14745	459.938	69.63	8916	12.066	33985347	1210
21	70754	15597	476.53	68.124	8788	12.42	33716610	1389
23	70073	17957	474.42	67.257	8627	12.311	33244221	1424
25	69590	17959	469.388	67.711	8496	12.208	32664729	1429
27	69032	17878	436.567	68.569	8373	12.129	32000995	1431
29	68027	27586	458.579	70.584	8258	12.139	31195796	1418
31	66762	25040	453.013	72.293	8033	12.032	30244069	1405
33	65812	20788	443.536	72.956	7842	11.915	29190006	1377
35	58786	16324	466.135	79.227	7581	12.859	27402215	1372
37	52410	14031	485.807	90.201	7181	13.7015	25461153	1336
39	46799	12272	498.134	102.979	6686	14.286	23312206	1268
41	42467	9858	490.9	114.325	5868	13.817	20847072	1106
43	39016	9126	459.432	131.468	4692	12.025	17925221	875
45	35108	7528	385.307	162.57	2690	7.662	13527354	558
47	21907	5271	299.65	275.27	713	3.254	6564443	321
Assembly using ABySS at different k-mers
K-mer	Total Transcripts (>100)	Max Length	Average Length	Average Coverage	Transcripts (Length >1000)	% transcripts (>1000)	Total-length (bp)	N50 (bp)
19	77923	4200	330.317	97.806	3225	4.138	25739314	456
21	52157	12900	505.959	102.688	7497	14.373	26388873	1096
23	47738	13754	551.459	105.519	7689	16.106	26325550	1344
25	46600	13576	562.964	107.391	7730	16.587	26234132	1415
27	45805	16036	567.587	107.617	7722	16.858	25998311	1445
29	44762	15419	572.64	107.805	7649	17.088	25632530	1480
31	47345	15419	545.159	103.604	7537	15.919	25810590	1415
33	47262	15419	533.99	106.387	7343	15.536	25237487	1391
35	45781	15428	532.605	109.623	7162	15.644	24383214	1374
37	45608	15098	516.472	112.89	6874	15.072	23555282	1323
39	45930	12208	494.344	115.437	6504	14.616	22525653	1234
41	46606	9774	455.517	116.676	5930	12.723	21229871	1095
43	52542	8468	382.086	113.002	5027	9.567	20075592	823
45	54739	8517	319.001	117.747	3556	6.496	17461841	546
47	53958	6205	239.084	143.775	1482	2.746	12900502	282
