# Supplementary material for: De Novo Transcriptome Sequencing and Analysis for Venturia inaequalis, the Devastating Apple Scab Pathogen
Source: PLoS One. 2013 Jan 17;8(1):e53937. doi: 10.1371/journal.pone.0053937 (PMC3547962; doi:10.1371/journal.pone.0053937)
Supplement: File S5 — Dissimilar sequence groupings for assembled V. inaequalis transcriptome sequences. (XLS) [file pone.0053937.s005.xls]

## Sheet: Sheet1
Table S5: Dissimilar sequence groupings for assembled V.inaequalis transcriptome sequences transcriptome sequences.
Group ID	Contigs#
Group0:	contig_1
Group1:	contig_2
Group2:	contig_7	contig_22617
Group3:	contig_8
Group4:	contig_9
Group5:	contig_10	contig_35846
Group6:	contig_11	contig_3709	contig_22755
Group7:	contig_12
Group8:	contig_14
Group9:	contig_15
Group10:	contig_17
Group11:	contig_19	contig_59389
Group12:	contig_20
Group13:	contig_21	contig_44922
Group14:	contig_24
Group15:	contig_26	contig_45800
Group16:	contig_28
Group17:	contig_29
Group18:	contig_32
Group19:	contig_35	contig_49889
Group20:	contig_36
Group21:	contig_37
Group22:	contig_39
Group23:	contig_42
Group24:	contig_43
Group25:	contig_44	contig_9908	contig_9959	contig_23126	contig_38627	contig_38663
Group26:	contig_45
Group27:	contig_46	contig_36291
Group28:	contig_51
Group29:	contig_52	contig_27126
Group30:	contig_53	contig_35989	contig_40320
Group31:	contig_55	contig_53135	contig_53136	contig_61268
Group32:	contig_56
Group33:	contig_57
Group34:	contig_59
Group35:	contig_61
Group36:	contig_62	contig_33632
Group37:	contig_63
Group38:	contig_65
Group39:	contig_68
Group40:	contig_69
Group41:	contig_72
Group42:	contig_73
Group43:	contig_75
Group44:	contig_77	contig_2522	contig_19670	contig_22897	contig_52591
Group45:	contig_82
Group46:	contig_83	contig_17288	contig_42263	contig_44911	contig_48623	contig_48624
Group47:	contig_85
Group48:	contig_86
Group49:	contig_87	contig_29269	contig_44870
Group50:	contig_90
Group51:	contig_91	contig_26727	contig_33891	contig_49883
Group52:	contig_92	contig_44279
Group53:	contig_94
Group54:	contig_95	contig_20127	contig_35991	contig_45214
Group55:	contig_96	contig_16341	contig_61542
Group56:	contig_103
Group57:	contig_105	contig_1178	contig_2050	contig_60464
Group58:	contig_106
Group59:	contig_108
Group60:	contig_109
Group61:	contig_113
Group62:	contig_116
Group63:	contig_118
Group64:	contig_119
Group65:	contig_121
Group66:	contig_123	contig_43668
Group67:	contig_125	contig_59304
Group68:	contig_126
Group69:	contig_128
Group70:	contig_129
Group71:	contig_130
Group72:	contig_131	contig_59307
Group73:	contig_133	contig_54344
Group74:	contig_135	contig_41249
Group75:	contig_136
Group76:	contig_138	contig_21496
Group77:	contig_140
Group78:	contig_141
Group79:	contig_144
Group80:	contig_145
Group81:	contig_146
Group82:	contig_150	contig_25169
Group83:	contig_151	contig_44955
Group84:	contig_152
Group85:	contig_153	contig_50306
Group86:	contig_154
Group87:	contig_155
Group88:	contig_156	contig_56042
Group89:	contig_158
Group90:	contig_161	contig_43975
Group91:	contig_163
Group92:	contig_164
Group93:	contig_165
Group94:	contig_166
Group95:	contig_168	contig_262	contig_9463	contig_11668	contig_20093
Group96:	contig_170
Group97:	contig_171	contig_57417	contig_60501
Group98:	contig_172
Group99:	contig_173
Group100:	contig_174	contig_54953
Group101:	contig_175	contig_47226
Group102:	contig_176	contig_6305	contig_51315
Group103:	contig_177
Group104:	contig_178
Group105:	contig_179
Group106:	contig_180
Group107:	contig_181
Group108:	contig_182
Group109:	contig_184	contig_22353	contig_45422	contig_49758
Group110:	contig_186
Group111:	contig_188	contig_42877
Group112:	contig_189
Group113:	contig_192
Group114:	contig_193
Group115:	contig_194
Group116:	contig_195
Group117:	contig_201	contig_56764
Group118:	contig_202
Group119:	contig_203
Group120:	contig_212
Group121:	contig_213
Group122:	contig_214
Group123:	contig_216
Group124:	contig_218
Group125:	contig_219
Group126:	contig_222	contig_13827
Group127:	contig_223
Group128:	contig_224
Group129:	contig_228
Group130:	contig_229
Group131:	contig_230
Group132:	contig_231
Group133:	contig_232	contig_587
Group134:	contig_233
Group135:	contig_234
Group136:	contig_235
Group137:	contig_237
Group138:	contig_238	contig_36367
Group139:	contig_242	contig_57732
Group140:	contig_245	contig_26653	contig_41639
Group141:	contig_248
Group142:	contig_249
Group143:	contig_250
Group144:	contig_251	contig_56390
Group145:	contig_252	contig_28031	contig_49988	contig_58149
Group146:	contig_253
Group147:	contig_256
Group148:	contig_257
Group149:	contig_259
Group151:	contig_264
Group152:	contig_265
Group153:	contig_269	contig_16109	contig_49334	contig_57090
Group154:	contig_270	contig_36181
Group155:	contig_271
Group156:	contig_273	contig_25756	contig_41323
Group157:	contig_274	contig_5646	contig_19841
Group158:	contig_276	contig_25535
Group159:	contig_278	contig_12582	contig_27139
Group160:	contig_279
Group161:	contig_280	contig_39227
Group162:	contig_284
Group163:	contig_285	contig_13960
Group164:	contig_287
Group165:	contig_289	contig_11950
Group166:	contig_290
Group167:	contig_293	contig_935	contig_45507	contig_53633	contig_59431
Group168:	contig_294
Group169:	contig_297	contig_26131	contig_54714	contig_54940
Group170:	contig_299
Group171:	contig_301
Group172:	contig_302	contig_52275
Group173:	contig_304
Group174:	contig_307
Group175:	contig_308
Group176:	contig_309
Group177:	contig_310	contig_39135
Group178:	contig_312
Group179:	contig_315
Group180:	contig_317
Group181:	contig_318
Group182:	contig_319	contig_49544	contig_50155
Group183:	contig_321
Group184:	contig_326
Group185:	contig_328
Group186:	contig_329	contig_26182	contig_58329
Group187:	contig_330
Group188:	contig_331	contig_25459
Group189:	contig_333
Group190:	contig_334	contig_34434	contig_48198
Group191:	contig_335
Group192:	contig_336	contig_1715
Group193:	contig_339	contig_26262	contig_57164
Group194:	contig_340	contig_24589
Group195:	contig_341	contig_57430
Group196:	contig_342
Group197:	contig_347
Group198:	contig_352	contig_3366	contig_12481	contig_58860
Group199:	contig_353	contig_11824
Group200:	contig_355
Group201:	contig_358	contig_47031
Group202:	contig_359
Group203:	contig_360
Group204:	contig_361	contig_6472
Group205:	contig_362
Group206:	contig_364	contig_36006	contig_47715
Group207:	contig_365
Group208:	contig_369
Group209:	contig_370	contig_40858
Group210:	contig_371
Group211:	contig_372	contig_48062
Group212:	contig_373	contig_32672
Group213:	contig_377
Group214:	contig_378
Group215:	contig_379	contig_46158
Group216:	contig_380
Group217:	contig_381
Group218:	contig_384
Group219:	contig_385
Group220:	contig_386
Group221:	contig_387
Group222:	contig_388
Group223:	contig_390
Group224:	contig_391
Group225:	contig_394	contig_25420
Group226:	contig_397
Group227:	contig_398
Group228:	contig_399	contig_49191	contig_49192
Group229:	contig_400
Group230:	contig_403
Group231:	contig_405	contig_53307
Group232:	contig_406
Group233:	contig_411
Group234:	contig_413
Group235:	contig_414
Group236:	contig_416
Group237:	contig_418	contig_23289	contig_25458
Group238:	contig_420
Group239:	contig_421
Group240:	contig_422
Group241:	contig_429
Group242:	contig_430
Group243:	contig_431
Group244:	contig_432
Group245:	contig_433
Group246:	contig_434	contig_8588
Group247:	contig_436
Group248:	contig_438
Group249:	contig_439
Group250:	contig_442
Group251:	contig_443
Group252:	contig_444
Group253:	contig_445
Group254:	contig_446
Group255:	contig_450
Group256:	contig_451
Group257:	contig_453
Group258:	contig_454	contig_37572	contig_37730
Group259:	contig_456
Group260:	contig_457
Group261:	contig_460
Group262:	contig_463
Group263:	contig_464
Group264:	contig_470
Group265:	contig_472
Group266:	contig_473
Group267:	contig_474
Group268:	contig_478
Group269:	contig_480
Group270:	contig_481
Group271:	contig_483	contig_555
Group272:	contig_484	contig_49895	contig_50050
Group273:	contig_486
Group274:	contig_490	contig_19986	contig_24223	contig_44552
Group275:	contig_491
Group276:	contig_492
Group277:	contig_494
Group278:	contig_495
Group279:	contig_496
Group280:	contig_497
Group281:	contig_502	contig_51992
Group282:	contig_503	contig_26121
Group283:	contig_505
Group284:	contig_506
Group285:	contig_508	contig_49038
Group286:	contig_510	contig_29155
Group287:	contig_511
Group288:	contig_512	contig_8627	contig_48136
Group289:	contig_513	contig_1313	contig_48045
Group290:	contig_514	contig_56044
Group291:	contig_516
Group292:	contig_518	contig_34906
Group293:	contig_519
Group294:	contig_521
Group295:	contig_524
Group296:	contig_525
Group297:	contig_526
Group298:	contig_527
Group299:	contig_530	contig_26166	contig_44693
Group300:	contig_531
Group301:	contig_532	contig_36917
Group302:	contig_534	contig_1103	contig_1197	contig_2034	contig_38179
Group303:	contig_536
Group304:	contig_538
Group305:	contig_540
Group306:	contig_541
Group307:	contig_542
Group308:	contig_545
Group309:	contig_547
Group310:	contig_548
Group311:	contig_549
Group312:	contig_550
Group313:	contig_554
Group315:	contig_556
Group316:	contig_558	contig_46288
Group317:	contig_559
Group318:	contig_561
Group319:	contig_562	contig_39050
Group320:	contig_563
Group321:	contig_567	contig_45708	contig_54955
Group322:	contig_568
Group323:	contig_569	contig_50268	contig_59212
Group324:	contig_571	contig_896
Group325:	contig_572	contig_50184
Group326:	contig_573
Group327:	contig_574	contig_12251
Group328:	contig_576
Group329:	contig_579	contig_689
Group330:	contig_580
Group331:	contig_582	contig_59342
Group332:	contig_584	contig_40949	contig_41296	contig_50570
Group333:	contig_585	contig_45023
Group334:	contig_586
Group336:	contig_588
Group337:	contig_590
Group338:	contig_592	contig_50272
Group339:	contig_593	contig_56529
Group340:	contig_594
Group341:	contig_595
Group342:	contig_596	contig_8649
Group343:	contig_597	contig_32741
Group344:	contig_598
Group345:	contig_599
Group346:	contig_602
Group347:	contig_603
Group348:	contig_605
Group349:	contig_606
Group350:	contig_609
Group351:	contig_610
Group352:	contig_611
Group353:	contig_612
Group354:	contig_614
Group355:	contig_615	contig_45496
Group356:	contig_617	contig_47878
Group357:	contig_618
Group358:	contig_619	contig_15547	contig_38060
Group359:	contig_622
Group360:	contig_623
Group361:	contig_624
Group362:	contig_625
Group363:	contig_629
Group364:	contig_632	contig_1509
Group365:	contig_633
Group366:	contig_635
Group367:	contig_637
Group368:	contig_638
Group369:	contig_642	contig_32300
Group370:	contig_645
Group371:	contig_647
Group372:	contig_655
Group373:	contig_658	contig_55801
Group374:	contig_661
Group375:	contig_663
Group376:	contig_665
Group377:	contig_666
Group378:	contig_668
Group379:	contig_670
Group380:	contig_673
Group381:	contig_676
Group382:	contig_678	contig_7094	contig_27133	contig_44770	contig_53245	contig_60205
Group383:	contig_679	contig_7739
Group384:	contig_680
Group385:	contig_682
Group386:	contig_683	contig_8489
Group387:	contig_684	contig_56300
Group388:	contig_685
Group389:	contig_686
Group390:	contig_687
Group391:	contig_688
Group393:	contig_693	contig_19187	contig_28756	contig_40166	contig_45634
Group394:	contig_696	contig_37133
Group395:	contig_697
Group396:	contig_700	contig_51763
Group397:	contig_701
Group398:	contig_705
Group399:	contig_707	contig_930	contig_58673
Group400:	contig_708
Group401:	contig_710
Group402:	contig_711	contig_44636	contig_44637
Group403:	contig_712	contig_16548	contig_31895	contig_37012
Group404:	contig_713
Group405:	contig_714
Group406:	contig_717
Group407:	contig_720
Group408:	contig_721
Group409:	contig_724
Group410:	contig_725	contig_51481
Group411:	contig_726
Group412:	contig_727	contig_39541
Group413:	contig_730
Group414:	contig_739
Group415:	contig_740	contig_49691
Group416:	contig_742
Group417:	contig_743	contig_58318
Group418:	contig_747
Group419:	contig_748	contig_45979
Group420:	contig_750
Group421:	contig_753	contig_10179
Group422:	contig_754
Group423:	contig_758
Group424:	contig_760
Group425:	contig_764
Group426:	contig_765
Group427:	contig_767
Group428:	contig_768
Group429:	contig_769
Group430:	contig_771
Group431:	contig_772
Group432:	contig_773
Group433:	contig_774
Group434:	contig_775	contig_40494	contig_45084
Group435:	contig_777
Group436:	contig_778
Group437:	contig_779
Group438:	contig_780	contig_29546
Group439:	contig_782
Group440:	contig_783
Group441:	contig_786
Group442:	contig_787	contig_11686	contig_32742	contig_59125
Group443:	contig_788
Group444:	contig_790
Group445:	contig_791	contig_52822
Group446:	contig_792
Group447:	contig_797
Group448:	contig_801
Group449:	contig_803
Group450:	contig_804
Group451:	contig_806
Group452:	contig_810
Group453:	contig_811
Group454:	contig_812
Group455:	contig_815
Group456:	contig_816
Group457:	contig_818	contig_53908
Group458:	contig_819
Group459:	contig_820	contig_31898
Group460:	contig_821
Group461:	contig_822
Group462:	contig_824
Group463:	contig_827
Group464:	contig_829
Group465:	contig_834	contig_23953	contig_54780
Group466:	contig_835
Group467:	contig_836
Group468:	contig_838
Group469:	contig_840
Group470:	contig_841	contig_21613
Group471:	contig_842
Group472:	contig_846	contig_61634
Group473:	contig_847
Group474:	contig_848
Group475:	contig_850	contig_31072	contig_49488
Group476:	contig_851
Group477:	contig_852
Group478:	contig_854	contig_1350	contig_19689	contig_39579
Group479:	contig_856	contig_43732
Group480:	contig_857
Group481:	contig_858
Group482:	contig_860	contig_33739	contig_35019	contig_54239
Group483:	contig_861
Group484:	contig_862	contig_32173	contig_45733	contig_60083
Group485:	contig_865
Group486:	contig_867
Group487:	contig_868	contig_11313
Group488:	contig_869
Group489:	contig_871
Group490:	contig_872	contig_32515
Group491:	contig_874
Group492:	contig_875	contig_4093	contig_44661
Group493:	contig_876
Group494:	contig_878
Group495:	contig_880	contig_58563
Group496:	contig_882	contig_7762
Group497:	contig_883
Group498:	contig_884
Group499:	contig_885
Group500:	contig_886
Group501:	contig_888
Group502:	contig_889
Group503:	contig_890
Group504:	contig_892
Group505:	contig_894
Group506:	contig_895
Group508:	contig_899	contig_33358
Group509:	contig_901	contig_2168	contig_16567	contig_22152	contig_30367	contig_55916	contig_57837	contig_57838	contig_61204
Group510:	contig_903	contig_39949
Group511:	contig_905	contig_40515
Group512:	contig_907
Group513:	contig_909	contig_56549
Group514:	contig_912	contig_5066	contig_5410	contig_7201
Group515:	contig_913	contig_37022
Group516:	contig_916
Group517:	contig_917
Group518:	contig_918
Group519:	contig_920	contig_4300	contig_48886
Group520:	contig_922	contig_6173	contig_45474
Group521:	contig_923
Group522:	contig_924
Group523:	contig_925
Group524:	contig_926	contig_51183
Group525:	contig_927
Group526:	contig_928	contig_36716
Group528:	contig_931
Group529:	contig_932	contig_45782
Group531:	contig_936	contig_43255	contig_53875
Group532:	contig_937	contig_56329
Group533:	contig_938	contig_43733
Group534:	contig_939
Group535:	contig_940	contig_34833
Group536:	contig_941
Group537:	contig_944
Group538:	contig_946
Group539:	contig_949
Group540:	contig_955
Group541:	contig_956
Group542:	contig_958
Group543:	contig_960
Group544:	contig_961	contig_35322
Group545:	contig_963
Group546:	contig_964
Group547:	contig_966
Group548:	contig_968
Group549:	contig_969
Group550:	contig_970
Group551:	contig_973
Group552:	contig_974
Group553:	contig_976
Group554:	contig_977	contig_15799
Group555:	contig_979
Group556:	contig_980	contig_5222
Group557:	contig_981
Group558:	contig_983
Group559:	contig_987
Group560:	contig_989
Group561:	contig_990
Group562:	contig_991
Group563:	contig_992
Group564:	contig_994
Group565:	contig_995	contig_38077
Group566:	contig_997
Group567:	contig_999
Group568:	contig_1000
Group569:	contig_1002
Group570:	contig_1003
Group571:	contig_1004
Group572:	contig_1005	contig_21624
Group573:	contig_1006
Group574:	contig_1007
Group575:	contig_1012	contig_61761
Group576:	contig_1014
Group577:	contig_1017
Group578:	contig_1018	contig_57986
Group579:	contig_1019
Group580:	contig_1021
Group581:	contig_1022	contig_57665
Group582:	contig_1024
Group583:	contig_1027
Group584:	contig_1028	contig_18513
Group585:	contig_1029
Group586:	contig_1030	contig_45438	contig_51417
Group587:	contig_1031
Group588:	contig_1036
Group589:	contig_1037
Group590:	contig_1038
Group591:	contig_1040
Group592:	contig_1041
Group593:	contig_1043	contig_36246	contig_38407
Group594:	contig_1044	contig_40601
Group595:	contig_1045
Group596:	contig_1049
Group597:	contig_1053
Group598:	contig_1054	contig_1540	contig_11788	contig_21709	contig_25043	contig_32502	contig_34498	contig_40607	contig_52838	contig_54063	contig_58465
Group599:	contig_1058
Group600:	contig_1059	contig_31445	contig_42732	contig_54438	contig_58524
Group601:	contig_1060
Group602:	contig_1062	contig_8603	contig_22752	contig_31810	contig_37877	contig_39668	contig_39669	contig_43689	contig_50283
Group603:	contig_1064
Group604:	contig_1069
Group605:	contig_1071
Group606:	contig_1072
Group607:	contig_1074	contig_33547	contig_57243
Group608:	contig_1076
Group609:	contig_1077	contig_14211	contig_23863
Group610:	contig_1079
Group611:	contig_1080
Group612:	contig_1082
Group613:	contig_1083
Group614:	contig_1084
Group615:	contig_1085
Group616:	contig_1088
Group617:	contig_1090
Group618:	contig_1092	contig_29779	contig_58909
Group619:	contig_1093
Group620:	contig_1095	contig_5820	contig_32339	contig_36204	contig_62004
Group621:	contig_1097
Group623:	contig_1104
Group624:	contig_1106
Group625:	contig_1115
Group626:	contig_1116	contig_57823
Group627:	contig_1117	contig_21452	contig_55078
Group628:	contig_1119
Group629:	contig_1120
Group630:	contig_1122
Group631:	contig_1124	contig_38121
Group632:	contig_1126
Group633:	contig_1128	contig_52603
Group634:	contig_1129	contig_4464
Group635:	contig_1130
Group636:	contig_1132
Group637:	contig_1134
Group638:	contig_1135	contig_9449
Group639:	contig_1136
Group640:	contig_1137
Group641:	contig_1138
Group642:	contig_1141	contig_34898
Group643:	contig_1146
Group644:	contig_1148	contig_25370	contig_34165
Group645:	contig_1152
Group646:	contig_1153	contig_29984	contig_41492	contig_57442
Group647:	contig_1154
Group648:	contig_1155	contig_15431
Group649:	contig_1156
Group650:	contig_1157
Group651:	contig_1158
Group652:	contig_1162
Group653:	contig_1166	contig_29112
Group654:	contig_1168	contig_1503	contig_58871
Group655:	contig_1174
Group656:	contig_1177	contig_47478
Group658:	contig_1181	contig_27751	contig_32467
Group659:	contig_1182	contig_24936
Group660:	contig_1183
Group661:	contig_1184	contig_55979
Group662:	contig_1185
Group663:	contig_1187
Group664:	contig_1188
Group665:	contig_1190
Group666:	contig_1191
Group667:	contig_1192	contig_27077	contig_47818
Group668:	contig_1193
Group669:	contig_1194	contig_29151	contig_45983
Group670:	contig_1195	contig_7257	contig_16795
Group671:	contig_1196	contig_19754
Group673:	contig_1198
Group674:	contig_1199
Group675:	contig_1202	contig_48678	contig_48679
Group676:	contig_1204
Group677:	contig_1205
Group678:	contig_1206
Group679:	contig_1208
Group680:	contig_1209	contig_27837
Group681:	contig_1210
Group682:	contig_1213
Group683:	contig_1218
Group684:	contig_1219	contig_2506
Group685:	contig_1220
Group686:	contig_1221	contig_10723
Group687:	contig_1222
Group688:	contig_1223
Group689:	contig_1224
Group690:	contig_1225	contig_28200	contig_36514	contig_36941	contig_49825	contig_49826	contig_49907	contig_50276	contig_51895	contig_56223
Group691:	contig_1227
Group692:	contig_1229
Group693:	contig_1230
Group694:	contig_1233	contig_32729
Group695:	contig_1237	contig_1354
Group696:	contig_1238	contig_36141
Group697:	contig_1240	contig_14076	contig_61160
Group698:	contig_1242	contig_1259	contig_25972
Group699:	contig_1243	contig_37767	contig_53261
Group700:	contig_1246
Group701:	contig_1247	contig_34508
Group702:	contig_1248
Group703:	contig_1250
Group704:	contig_1251
Group705:	contig_1252
Group706:	contig_1253
Group707:	contig_1258
Group709:	contig_1262	contig_16277
Group710:	contig_1265
Group711:	contig_1266	contig_40892
Group712:	contig_1270	contig_32101
Group713:	contig_1272
Group714:	contig_1274
Group715:	contig_1276	contig_46081	contig_57950	contig_57951
Group716:	contig_1277
Group717:	contig_1278	contig_34181	contig_40938	contig_47385
Group718:	contig_1280	contig_60037
Group719:	contig_1281
Group720:	contig_1285
Group721:	contig_1286	contig_42407
Group722:	contig_1287
Group723:	contig_1292
Group724:	contig_1294
Group725:	contig_1295
Group726:	contig_1297
Group727:	contig_1298	contig_50127
Group728:	contig_1299
Group729:	contig_1302
Group730:	contig_1303	contig_51946
Group731:	contig_1304	contig_27769
Group732:	contig_1306
Group733:	contig_1307
Group734:	contig_1308
Group735:	contig_1311	contig_36836
Group736:	contig_1312
Group738:	contig_1316	contig_32326	contig_53518
Group739:	contig_1318	contig_20877	contig_30392
Group740:	contig_1320
Group741:	contig_1323
Group742:	contig_1325
Group743:	contig_1326
Group744:	contig_1328	contig_55966
Group745:	contig_1332
Group746:	contig_1333
Group747:	contig_1334
Group748:	contig_1335
Group749:	contig_1336
Group750:	contig_1337
Group751:	contig_1340
Group752:	contig_1342
Group753:	contig_1343
Group754:	contig_1344	contig_54107	contig_56355
Group755:	contig_1345
Group756:	contig_1347	contig_56215
Group759:	contig_1355	contig_41454	contig_54816	contig_54977
Group760:	contig_1356
Group761:	contig_1360
Group762:	contig_1362
Group763:	contig_1363
Group764:	contig_1364
Group765:	contig_1367
Group766:	contig_1368	contig_43730
Group767:	contig_1369
Group768:	contig_1371	contig_17542
Group769:	contig_1373
Group770:	contig_1375
Group771:	contig_1376
Group772:	contig_1377	contig_37028
Group773:	contig_1378
Group774:	contig_1380	contig_50205
Group775:	contig_1382
Group776:	contig_1384
Group777:	contig_1386	contig_34405
Group778:	contig_1390	contig_31815
Group779:	contig_1395	contig_26267	contig_32349	contig_60504
Group780:	contig_1396
Group781:	contig_1397
Group782:	contig_1400
Group783:	contig_1401
Group784:	contig_1402
Group785:	contig_1403
Group786:	contig_1404	contig_50196
Group787:	contig_1405
Group788:	contig_1406	contig_37419
Group789:	contig_1407	contig_53405
Group790:	contig_1408	contig_50103
Group791:	contig_1411	contig_59509
Group792:	contig_1412
Group793:	contig_1417
Group794:	contig_1418
Group795:	contig_1421
Group796:	contig_1424
Group797:	contig_1425	contig_54708	contig_56632
Group798:	contig_1427
Group799:	contig_1428
Group800:	contig_1430	contig_48682
Group801:	contig_1431	contig_48968
Group802:	contig_1433
Group803:	contig_1437
Group804:	contig_1441
Group805:	contig_1442	contig_33209	contig_53138	contig_53703	contig_53922
Group806:	contig_1443
Group807:	contig_1445	contig_28600
Group808:	contig_1446
Group809:	contig_1448
Group810:	contig_1452
Group811:	contig_1454	contig_56518
Group812:	contig_1458
Group813:	contig_1460
Group814:	contig_1462
Group815:	contig_1463
Group816:	contig_1464
Group817:	contig_1465
Group818:	contig_1467
Group819:	contig_1468
Group820:	contig_1470	contig_25385
Group821:	contig_1472
Group822:	contig_1473	contig_11568	contig_38783	contig_51954
Group823:	contig_1475
Group824:	contig_1476	contig_44579
Group825:	contig_1478	contig_57375
Group826:	contig_1479
Group827:	contig_1480
Group828:	contig_1481
Group829:	contig_1483
Group830:	contig_1484
Group831:	contig_1485	contig_40878	contig_50246	contig_52342
Group832:	contig_1486
Group833:	contig_1487
Group834:	contig_1488	contig_50534
Group835:	contig_1490
Group836:	contig_1491
Group837:	contig_1492
Group838:	contig_1494	contig_32628
Group839:	contig_1495
Group840:	contig_1496
Group841:	contig_1500	contig_50254	contig_60756
Group842:	contig_1501	contig_22078
Group844:	contig_1506	contig_47759	contig_60844	contig_61623
Group845:	contig_1507	contig_25555	contig_26110
Group846:	contig_1508	contig_51289
Group848:	contig_1510	contig_13878
Group849:	contig_1514	contig_38538
Group850:	contig_1517
Group852:	contig_1547
Group853:	contig_1548
Group854:	contig_1552
Group855:	contig_1554	contig_52846
Group856:	contig_1561	contig_50418
Group857:	contig_1562
Group858:	contig_1564
Group859:	contig_1566
Group860:	contig_1568	contig_9319	contig_23844	contig_24652
Group861:	contig_1573	contig_3189	contig_3826	contig_4730	contig_8391	contig_9961
Group862:	contig_1575
Group863:	contig_1577	contig_24987
Group864:	contig_1580
Group865:	contig_1585
Group866:	contig_1586
Group867:	contig_1587
Group868:	contig_1589	contig_22252
Group869:	contig_1598	contig_16090
Group870:	contig_1603
Group871:	contig_1604
Group872:	contig_1612
Group873:	contig_1618
Group874:	contig_1621
Group875:	contig_1625	contig_2513	contig_17240
Group876:	contig_1627
Group877:	contig_1630	contig_49150	contig_57210
Group878:	contig_1637	contig_4824
Group879:	contig_1648	contig_3910
Group880:	contig_1649	contig_22511
Group881:	contig_1650
Group882:	contig_1652	contig_40950
Group883:	contig_1655
Group884:	contig_1658	contig_6504	contig_12847	contig_23740
Group885:	contig_1661	contig_35230
Group886:	contig_1662
Group887:	contig_1663
Group888:	contig_1664	contig_20285	contig_56684
Group889:	contig_1666
Group890:	contig_1671
Group891:	contig_1674
Group892:	contig_1689
Group893:	contig_1690
Group894:	contig_1694	contig_61553
Group895:	contig_1699
Group896:	contig_1702
Group897:	contig_1703
Group898:	contig_1706
Group899:	contig_1710
Group900:	contig_1713
Group901:	contig_1714
Group903:	contig_1718
Group904:	contig_1720
Group905:	contig_1721
Group906:	contig_1725
Group907:	contig_1728	contig_5371
Group908:	contig_1735
Group909:	contig_1736	contig_57184
Group910:	contig_1738	contig_15140	contig_22331
Group911:	contig_1747	contig_47980
Group912:	contig_1752	contig_12284
Group913:	contig_1763
Group914:	contig_1765
Group915:	contig_1767	contig_3003	contig_17153
Group916:	contig_1770
Group917:	contig_1771
Group918:	contig_1773
Group919:	contig_1776	contig_39408	contig_39414
Group920:	contig_1780
Group921:	contig_1786	contig_29088
Group922:	contig_1787
Group923:	contig_1792	contig_9224	contig_9402	contig_17326	contig_24958	contig_29563	contig_45844	contig_53059	contig_53060
Group924:	contig_1793
Group925:	contig_1797	contig_7683	contig_15957	contig_20253	contig_29342	contig_31229	contig_43424
Group926:	contig_1799
Group927:	contig_1800
Group928:	contig_1807
Group929:	contig_1810
Group930:	contig_1811
Group931:	contig_1816
Group932:	contig_1818
Group933:	contig_1819
Group934:	contig_1820
Group935:	contig_1821	contig_12991
Group936:	contig_1827
Group937:	contig_1835
Group938:	contig_1848
Group939:	contig_1851
Group940:	contig_1855
Group941:	contig_1858	contig_24547	contig_39348
Group942:	contig_1859	contig_24124
Group943:	contig_1863
Group944:	contig_1865
Group945:	contig_1868	contig_8366	contig_9006
Group946:	contig_1869
Group947:	contig_1870
Group948:	contig_1871	contig_6124	contig_20033	contig_32090	contig_48593
Group949:	contig_1874
Group950:	contig_1877	contig_33520	contig_47042	contig_61846
Group951:	contig_1878
Group952:	contig_1880	contig_45437
Group953:	contig_1884
Group954:	contig_1887	contig_6271	contig_35025
Group955:	contig_1892
Group956:	contig_1893
Group957:	contig_1896	contig_2629
Group958:	contig_1899	contig_12518
Group959:	contig_1912
Group960:	contig_1914	contig_4776	contig_5228	contig_22631	contig_23197	contig_43239
Group961:	contig_1918
Group962:	contig_1920
Group963:	contig_1922	contig_36047
Group964:	contig_1923
Group965:	contig_1925
Group966:	contig_1937
Group967:	contig_1938	contig_7358	contig_7859
Group968:	contig_1940
Group969:	contig_1943
Group970:	contig_1944
Group971:	contig_1950
Group972:	contig_1953
Group973:	contig_1958
Group974:	contig_1962
Group975:	contig_1963
Group976:	contig_1965
Group977:	contig_1972
Group978:	contig_1975
Group979:	contig_1977	contig_12881	contig_57434
Group980:	contig_1981
Group981:	contig_1984
Group982:	contig_1987
Group983:	contig_1992	contig_46947
Group984:	contig_1996
Group985:	contig_1998
Group986:	contig_1999
Group987:	contig_2006	contig_22875
Group988:	contig_2007	contig_7395	contig_17745	contig_21126
Group989:	contig_2009
Group990:	contig_2013
Group991:	contig_2018	contig_19010
Group992:	contig_2020
Group993:	contig_2021	contig_7711	contig_9103
Group995:	contig_2037
Group996:	contig_2039
Group997:	contig_2040
Group998:	contig_2048	contig_8352	contig_60856
Group1000:	contig_2051	contig_19852
Group1001:	contig_2056	contig_15704	contig_15826
Group1002:	contig_2058
Group1003:	contig_2064	contig_61766
Group1004:	contig_2080
Group1005:	contig_2081	contig_51311
Group1006:	contig_2084	contig_29132
Group1007:	contig_2085	contig_37121
Group1008:	contig_2087
Group1009:	contig_2089
Group1010:	contig_2092	contig_5841	contig_22037
Group1011:	contig_2093
Group1012:	contig_2095
Group1013:	contig_2100
Group1014:	contig_2101
Group1015:	contig_2105
Group1016:	contig_2106
Group1017:	contig_2112	contig_56819
Group1018:	contig_2113	contig_16845	contig_21954	contig_39699
Group1019:	contig_2114
Group1020:	contig_2116	contig_57630
Group1021:	contig_2137
Group1022:	contig_2142
Group1023:	contig_2143	contig_17698	contig_38698
Group1024:	contig_2146
Group1025:	contig_2149	contig_23687	contig_47604
Group1026:	contig_2151
Group1027:	contig_2153	contig_24956
Group1028:	contig_2157	contig_2566
Group1029:	contig_2164
Group1030:	contig_2165
Group1032:	contig_2170
Group1033:	contig_2176	contig_4533
Group1034:	contig_2177	contig_8002	contig_8826
Group1035:	contig_2179	contig_43146
Group1036:	contig_2180	contig_57278
Group1037:	contig_2186
Group1038:	contig_2187
Group1039:	contig_2190
Group1040:	contig_2192
Group1041:	contig_2193	contig_21908	contig_50158
Group1042:	contig_2199
Group1043:	contig_2207	contig_2880	contig_4705	contig_34173
Group1044:	contig_2209
Group1045:	contig_2212	contig_20291	contig_21401	contig_37360	contig_60769	contig_61115
Group1046:	contig_2215
Group1047:	contig_2216	contig_3326
Group1048:	contig_2220
Group1049:	contig_2226
Group1050:	contig_2228
Group1051:	contig_2230
Group1052:	contig_2231
Group1053:	contig_2232
Group1054:	contig_2233	contig_47521	contig_61726
Group1055:	contig_2234
Group1056:	contig_2238	contig_10084
Group1057:	contig_2246	contig_24902
Group1058:	contig_2249	contig_7244	contig_7594	contig_8265	contig_8621	contig_19936	contig_32560	contig_34501	contig_42967
Group1059:	contig_2254	contig_6931
Group1060:	contig_2255
Group1061:	contig_2262
Group1062:	contig_2263
Group1063:	contig_2264	contig_19918
Group1064:	contig_2266	contig_9875	contig_34962
Group1065:	contig_2270	contig_5912	contig_17772	contig_44936	contig_50540	contig_60895
Group1066:	contig_2271
Group1067:	contig_2276
Group1068:	contig_2284
Group1069:	contig_2293
Group1070:	contig_2300
Group1071:	contig_2304
Group1072:	contig_2307	contig_53867
Group1073:	contig_2314	contig_12600	contig_31986	contig_55227
Group1074:	contig_2317
Group1075:	contig_2321	contig_9665
Group1076:	contig_2323
Group1077:	contig_2326
Group1078:	contig_2332	contig_16373
Group1079:	contig_2334	contig_9596	contig_17200	contig_30411	contig_34535	contig_61957
Group1080:	contig_2336
Group1081:	contig_2338
Group1082:	contig_2348	contig_12613	contig_15155	contig_18175	contig_23813	contig_33384	contig_34053	contig_46076	contig_52254	contig_54844	contig_56143	contig_61226
Group1083:	contig_2352
Group1084:	contig_2356
Group1085:	contig_2357
Group1086:	contig_2361	contig_38736	contig_48351
Group1087:	contig_2362
Group1088:	contig_2364
Group1089:	contig_2368
Group1090:	contig_2373
Group1091:	contig_2378
Group1092:	contig_2379	contig_33457
Group1093:	contig_2381
Group1094:	contig_2382
Group1095:	contig_2383
Group1096:	contig_2387	contig_4733	contig_18921	contig_39097	contig_41394	contig_53852
Group1097:	contig_2396
Group1098:	contig_2398
Group1099:	contig_2404	contig_17440	contig_19564	contig_32020
Group1100:	contig_2405
Group1101:	contig_2408
Group1102:	contig_2412	contig_38777
Group1103:	contig_2414	contig_24424
Group1104:	contig_2415
Group1105:	contig_2416
Group1106:	contig_2417
Group1107:	contig_2418
Group1108:	contig_2425	contig_2686
Group1109:	contig_2430	contig_43122
Group1110:	contig_2431	contig_48960
Group1111:	contig_2445
Group1112:	contig_2454
Group1113:	contig_2456	contig_6209
Group1114:	contig_2457
Group1115:	contig_2458
Group1116:	contig_2462
Group1117:	contig_2468	contig_6739	contig_8317	contig_13536	contig_42827
Group1118:	contig_2469
Group1119:	contig_2470	contig_24179
Group1120:	contig_2471
Group1121:	contig_2476	contig_31567
Group1122:	contig_2477
Group1123:	contig_2478
Group1124:	contig_2484
Group1125:	contig_2485
Group1126:	contig_2488
Group1127:	contig_2491	contig_44377
Group1128:	contig_2496
Group1129:	contig_2501	contig_17247	contig_19433
Group1131:	contig_2507
Group1132:	contig_2508
Group1133:	contig_2512	contig_2727
Group1135:	contig_2516	contig_4012	contig_52298
Group1137:	contig_2523
Group1138:	contig_2527	contig_20828	contig_52682
Group1139:	contig_2528	contig_55037
Group1140:	contig_2532
Group1141:	contig_2534	contig_4457	contig_8208
Group1142:	contig_2537	contig_9503	contig_39339
Group1143:	contig_2557
Group1144:	contig_2565
Group1146:	contig_2567	contig_15312	contig_23964
Group1147:	contig_2569
Group1148:	contig_2577	contig_22287	contig_24107	contig_29933	contig_45371
Group1149:	contig_2578	contig_48686
Group1150:	contig_2581	contig_10924
Group1151:	contig_2584
Group1152:	contig_2596	contig_9477	contig_19931
Group1153:	contig_2607	contig_7817
Group1154:	contig_2608
Group1155:	contig_2621
Group1156:	contig_2622
Group1157:	contig_2627
Group1159:	contig_2630
Group1160:	contig_2632	contig_23290	contig_28054
Group1161:	contig_2633
Group1162:	contig_2636
Group1163:	contig_2645
Group1164:	contig_2648	contig_38858
Group1165:	contig_2651
Group1166:	contig_2653	contig_8895	contig_9530
Group1167:	contig_2654
Group1168:	contig_2657	contig_2782	contig_6991	contig_9040	contig_12935	contig_13520	contig_29500	contig_34356
Group1169:	contig_2662	contig_18441	contig_38723
Group1170:	contig_2669
Group1171:	contig_2673	contig_19131
Group1172:	contig_2681
Group1174:	contig_2690
Group1175:	contig_2693
Group1176:	contig_2698
Group1177:	contig_2700
Group1178:	contig_2702
Group1179:	contig_2704
Group1180:	contig_2705	contig_3289	contig_38760	contig_42402
Group1181:	contig_2717	contig_51598
Group1182:	contig_2726
Group1184:	contig_2728
Group1185:	contig_2730	contig_6091
Group1186:	contig_2738
Group1187:	contig_2740
Group1188:	contig_2741
Group1189:	contig_2742
Group1190:	contig_2746
Group1191:	contig_2751
Group1192:	contig_2754
Group1193:	contig_2755
Group1194:	contig_2757
Group1195:	contig_2763
Group1196:	contig_2766
Group1197:	contig_2767
Group1198:	contig_2771
Group1199:	contig_2772
Group1200:	contig_2775
Group1201:	contig_2776
Group1203:	contig_2787
Group1204:	contig_2788	contig_55449
Group1205:	contig_2789
Group1206:	contig_2790
Group1207:	contig_2797
Group1208:	contig_2799
Group1209:	contig_2811	contig_33595	contig_50219
Group1210:	contig_2813	contig_3424	contig_18898	contig_26399	contig_47588	contig_52268	contig_58597
Group1211:	contig_2816
Group1212:	contig_2820	contig_54694
Group1213:	contig_2827	contig_9457	contig_37568	contig_48395
Group1214:	contig_2829	contig_10321	contig_16156
Group1215:	contig_2831
Group1216:	contig_2834
Group1217:	contig_2841
Group1218:	contig_2842	contig_38320
Group1219:	contig_2843
Group1220:	contig_2844
Group1221:	contig_2846
Group1222:	contig_2849
Group1223:	contig_2861
Group1224:	contig_2864
Group1225:	contig_2868	contig_7488
Group1226:	contig_2871	contig_6084	contig_14866	contig_22689
Group1227:	contig_2873
Group1228:	contig_2877	contig_52885
Group1229:	contig_2879
Group1231:	contig_2886	contig_35293
Group1232:	contig_2890
Group1233:	contig_2892
Group1234:	contig_2895	contig_38506	contig_42910	contig_61573
Group1235:	contig_2899
Group1236:	contig_2902
Group1237:	contig_2903
Group1238:	contig_2906	contig_3863
Group1239:	contig_2909
Group1240:	contig_2913
Group1241:	contig_2914	contig_38905
Group1242:	contig_2917
Group1243:	contig_2922	contig_7348	contig_11793	contig_14132
Group1244:	contig_2924
Group1245:	contig_2930
Group1246:	contig_2933
Group1247:	contig_2936
Group1248:	contig_2939
Group1249:	contig_2940
Group1250:	contig_2948	contig_6410	contig_34290
Group1251:	contig_2950	contig_55905
Group1252:	contig_2952
Group1253:	contig_2953
Group1254:	contig_2954
Group1255:	contig_2968	contig_35968
Group1256:	contig_2970
Group1257:	contig_2972	contig_21888
Group1258:	contig_2973	contig_19024	contig_43585	contig_52151
Group1259:	contig_2974	contig_33904	contig_38090
Group1260:	contig_2978	contig_43671
Group1261:	contig_2980
Group1262:	contig_2983
Group1263:	contig_2984
Group1264:	contig_2985
Group1265:	contig_2988
Group1266:	contig_2989
Group1267:	contig_2993
Group1268:	contig_2995	contig_43363
Group1269:	contig_2998	contig_18164	contig_32744
Group1271:	contig_3008
Group1272:	contig_3017
Group1273:	contig_3023	contig_51527	contig_60462
Group1274:	contig_3024
Group1275:	contig_3031
Group1276:	contig_3034
Group1277:	contig_3038	contig_38551
Group1278:	contig_3043	contig_57673
Group1279:	contig_3045	contig_3871
Group1280:	contig_3046
Group1281:	contig_3048	contig_29294
Group1282:	contig_3049	contig_17143
Group1283:	contig_3052
Group1284:	contig_3054	contig_7061	contig_25180
Group1285:	contig_3055
Group1286:	contig_3057
Group1287:	contig_3068
Group1288:	contig_3076	contig_17199
Group1289:	contig_3083
Group1290:	contig_3085
Group1291:	contig_3087	contig_32896
Group1292:	contig_3093	contig_5000	contig_16715	contig_30942	contig_60570
Group1293:	contig_3095
Group1294:	contig_3096
Group1295:	contig_3101	contig_38617
Group1296:	contig_3105
Group1297:	contig_3109
Group1298:	contig_3117
Group1299:	contig_3126
Group1300:	contig_3129
Group1301:	contig_3135
Group1302:	contig_3137	contig_16739	contig_59951
Group1303:	contig_3139
Group1304:	contig_3144
Group1305:	contig_3146	contig_48130
Group1306:	contig_3149	contig_38731	contig_56063
Group1307:	contig_3150
Group1308:	contig_3158
Group1309:	contig_3162
Group1310:	contig_3168
Group1311:	contig_3186	contig_29423
Group1313:	contig_3194
Group1314:	contig_3197	contig_4118
Group1315:	contig_3199	contig_7450
Group1316:	contig_3204
Group1317:	contig_3205
Group1318:	contig_3209
Group1319:	contig_3213	contig_20206
Group1320:	contig_3215
Group1321:	contig_3220
Group1322:	contig_3222
Group1323:	contig_3223
Group1324:	contig_3224	contig_7696	contig_8258	contig_8536	contig_9498
Group1325:	contig_3230	contig_3972	contig_45681
Group1326:	contig_3235	contig_5501	contig_6295	contig_11716	contig_12101	contig_19698	contig_24861	contig_24938	contig_29691	contig_34175	contig_57475
Group1327:	contig_3238
Group1328:	contig_3240
Group1329:	contig_3242
Group1330:	contig_3244
Group1331:	contig_3245	contig_22957
Group1332:	contig_3246
Group1333:	contig_3247
Group1334:	contig_3257
Group1335:	contig_3262
Group1336:	contig_3267
Group1337:	contig_3269
Group1338:	contig_3271
Group1339:	contig_3274
Group1340:	contig_3276
Group1341:	contig_3278
Group1342:	contig_3279	contig_5960
Group1343:	contig_3286
Group1345:	contig_3294	contig_8051
Group1346:	contig_3295	contig_57270
Group1347:	contig_3296
Group1348:	contig_3299
Group1349:	contig_3300
Group1350:	contig_3302
Group1351:	contig_3303	contig_8401
Group1352:	contig_3304
Group1353:	contig_3305
Group1354:	contig_3310	contig_19813	contig_36730	contig_56737
Group1355:	contig_3313	contig_4794
Group1356:	contig_3315	contig_7513
Group1357:	contig_3320
Group1358:	contig_3323
Group1359:	contig_3324
Group1360:	contig_3325	contig_11956	contig_32528	contig_32720	contig_44474	contig_45570	contig_46085
Group1362:	contig_3334
Group1363:	contig_3346	contig_8368
Group1364:	contig_3349
Group1365:	contig_3351
Group1366:	contig_3357	contig_26694	contig_32063
Group1367:	contig_3358
Group1368:	contig_3360	contig_7417	contig_16913	contig_25365
Group1370:	contig_3369	contig_14385
Group1371:	contig_3377
Group1372:	contig_3379
Group1373:	contig_3385
Group1374:	contig_3389
Group1375:	contig_3393
Group1376:	contig_3394
Group1377:	contig_3395
Group1378:	contig_3397
Group1379:	contig_3398
Group1380:	contig_3406	contig_29501	contig_55544
Group1381:	contig_3413
Group1382:	contig_3414	contig_9066
Group1383:	contig_3418
Group1385:	contig_3426
Group1386:	contig_3430
Group1387:	contig_3432
Group1388:	contig_3436
Group1389:	contig_3439	contig_26902	contig_32433	contig_51000
Group1390:	contig_3445
Group1391:	contig_3452	contig_5402	contig_6808	contig_30071	contig_52241
Group1392:	contig_3456
Group1393:	contig_3463	contig_50994
Group1394:	contig_3465
Group1395:	contig_3469	contig_26828
Group1396:	contig_3483	contig_32402
Group1397:	contig_3492	contig_6631	contig_26731
Group1398:	contig_3493
Group1399:	contig_3499
Group1400:	contig_3500	contig_6805	contig_36996	contig_40896	contig_45512
Group1401:	contig_3501	contig_14155
Group1402:	contig_3512
Group1403:	contig_3514
Group1404:	contig_3516	contig_39007
Group1405:	contig_3519	contig_42981
Group1406:	contig_3523
Group1407:	contig_3524
Group1408:	contig_3526
Group1409:	contig_3527	contig_5273	contig_6672	contig_13711
Group1410:	contig_3532
Group1411:	contig_3538	contig_9343
Group1412:	contig_3547
Group1413:	contig_3554
Group1414:	contig_3555	contig_14446	contig_46098
Group1415:	contig_3557
Group1416:	contig_3558	contig_10550
Group1417:	contig_3559
Group1418:	contig_3566	contig_28189	contig_29647	contig_41516	contig_49543
Group1419:	contig_3567	contig_5618	contig_8311	contig_9594
Group1420:	contig_3573	contig_6771	contig_18149	contig_47483
Group1421:	contig_3578
Group1422:	contig_3579	contig_10015
Group1423:	contig_3587
Group1424:	contig_3589	contig_19293	contig_19882	contig_47602	contig_61952
Group1425:	contig_3594
Group1426:	contig_3595	contig_58714
Group1427:	contig_3597
Group1428:	contig_3598
Group1429:	contig_3599
Group1430:	contig_3600
Group1431:	contig_3601	contig_5939
Group1432:	contig_3602	contig_25733	contig_36542
Group1433:	contig_3607
Group1434:	contig_3612	contig_24215
Group1435:	contig_3614
Group1436:	contig_3616
Group1437:	contig_3618
Group1438:	contig_3619
Group1439:	contig_3622
Group1440:	contig_3627
Group1441:	contig_3629	contig_42669
Group1442:	contig_3631
Group1443:	contig_3637	contig_43507
Group1444:	contig_3640
Group1445:	contig_3647	contig_41474	contig_43835
Group1446:	contig_3648
Group1447:	contig_3650	contig_4231	contig_24833
Group1448:	contig_3652	contig_39043	contig_39589
Group1449:	contig_3659	contig_41238
Group1450:	contig_3661
Group1451:	contig_3662	contig_5133
Group1452:	contig_3665
Group1453:	contig_3666
Group1454:	contig_3672
Group1455:	contig_3676
Group1456:	contig_3683
Group1457:	contig_3685	contig_25723
Group1458:	contig_3694
Group1459:	contig_3697	contig_6204
Group1460:	contig_3704
Group1461:	contig_3706
Group1463:	contig_3715
Group1464:	contig_3717	contig_43947
Group1465:	contig_3725
Group1466:	contig_3726	contig_22413	contig_22458	contig_29835	contig_54842
Group1467:	contig_3728
Group1468:	contig_3740
Group1469:	contig_3741	contig_57067
Group1470:	contig_3742
Group1471:	contig_3743	contig_9598	contig_58539
Group1472:	contig_3745	contig_8380	contig_27089	contig_30660	contig_30663	contig_30665	contig_30666	contig_30667	contig_30668	contig_30671
Group1473:	contig_3748
Group1474:	contig_3749
Group1475:	contig_3750	contig_7048	contig_7971	contig_19468
Group1476:	contig_3753	contig_53036
Group1477:	contig_3754
Group1478:	contig_3756
Group1479:	contig_3763	contig_11823	contig_50646
Group1480:	contig_3764
Group1481:	contig_3766
Group1482:	contig_3771	contig_4939	contig_11822	contig_23193	contig_25177
Group1483:	contig_3774	contig_10281
Group1484:	contig_3776
Group1485:	contig_3780
Group1486:	contig_3784
Group1487:	contig_3790
Group1488:	contig_3798	contig_16593
Group1489:	contig_3800
Group1490:	contig_3801
Group1491:	contig_3803	contig_31068
Group1492:	contig_3815
Group1493:	contig_3823
Group1494:	contig_3825
Group1496:	contig_3827
Group1497:	contig_3832	contig_51753
Group1498:	contig_3833
Group1499:	contig_3834	contig_16910
Group1500:	contig_3844	contig_9696	contig_48046	contig_52877	contig_58418
Group1501:	contig_3848
Group1502:	contig_3849
Group1503:	contig_3850	contig_27200
Group1504:	contig_3854
Group1505:	contig_3857
Group1507:	contig_3867
Group1509:	contig_3875
Group1510:	contig_3876
Group1511:	contig_3877	contig_25879
Group1512:	contig_3878	contig_8837
Group1513:	contig_3881	contig_5369	contig_6679
Group1514:	contig_3882	contig_23007
Group1515:	contig_3885
Group1516:	contig_3886
Group1517:	contig_3891	contig_19730	contig_45439
Group1518:	contig_3893
Group1519:	contig_3896	contig_8694
Group1520:	contig_3900
Group1521:	contig_3902	contig_31684
Group1523:	contig_3913
Group1524:	contig_3918
Group1525:	contig_3924
Group1526:	contig_3942	contig_53385
Group1527:	contig_3943	contig_7572	contig_48124
Group1528:	contig_3950
Group1529:	contig_3952
Group1530:	contig_3959
Group1531:	contig_3968
Group1532:	contig_3971	contig_13060	contig_18487
Group1534:	contig_3975	contig_4275	contig_12610
Group1535:	contig_3982	contig_13604
Group1536:	contig_3985
Group1537:	contig_3993	contig_21840
Group1538:	contig_3998
Group1539:	contig_4000	contig_9741	contig_18876
Group1540:	contig_4005
Group1542:	contig_4022
Group1543:	contig_4028	contig_53116
Group1544:	contig_4038
Group1545:	contig_4039
Group1546:	contig_4043
Group1547:	contig_4044	contig_42560
Group1548:	contig_4047
Group1549:	contig_4051
Group1550:	contig_4053
Group1551:	contig_4057	contig_8719
Group1552:	contig_4063	contig_6175
Group1553:	contig_4064
Group1554:	contig_4072
Group1555:	contig_4076
Group1556:	contig_4077
Group1557:	contig_4084
Group1558:	contig_4087
Group1559:	contig_4088	contig_28185	contig_52441
Group1560:	contig_4089	contig_7012	contig_9829
Group1562:	contig_4094
Group1563:	contig_4100	contig_32106	contig_32456	contig_58843	contig_60806
Group1564:	contig_4105	contig_21920
Group1565:	contig_4106	contig_7398
Group1566:	contig_4114	contig_30084	contig_35669
Group1567:	contig_4115	contig_9384
Group1568:	contig_4117
Group1570:	contig_4121	contig_38209
Group1571:	contig_4123
Group1572:	contig_4126	contig_50999
Group1573:	contig_4127
Group1574:	contig_4134
Group1575:	contig_4147	contig_14635	contig_28153	contig_45111	contig_47499	contig_48342
Group1576:	contig_4151
Group1577:	contig_4153	contig_6147	contig_39606
Group1578:	contig_4162	contig_4941	contig_7410	contig_13671	contig_21274
Group1579:	contig_4163
Group1580:	contig_4165
Group1581:	contig_4168
Group1582:	contig_4172
Group1583:	contig_4173	contig_4643	contig_6669	contig_12826	contig_15643	contig_24368	contig_38400
Group1584:	contig_4178	contig_25131
Group1585:	contig_4180
Group1586:	contig_4182	contig_47489
Group1587:	contig_4187	contig_51995
Group1588:	contig_4188	contig_8024	contig_49902
Group1589:	contig_4192
Group1590:	contig_4195
Group1591:	contig_4203
Group1592:	contig_4205
Group1593:	contig_4206	contig_10506
Group1594:	contig_4229
Group1596:	contig_4234	contig_49524
Group1597:	contig_4237
Group1598:	contig_4238	contig_9439	contig_25220
Group1599:	contig_4239
Group1600:	contig_4241	contig_6630
Group1601:	contig_4242	contig_5130	contig_29842
Group1602:	contig_4244
Group1603:	contig_4251
Group1604:	contig_4263
Group1605:	contig_4268
Group1606:	contig_4270
Group1607:	contig_4271	contig_34167
Group1608:	contig_4274	contig_57526
Group1610:	contig_4276
Group1611:	contig_4281
Group1612:	contig_4291
Group1613:	contig_4298	contig_57188
Group1614:	contig_4299
Group1616:	contig_4306	contig_43839	contig_46686	contig_50466
Group1617:	contig_4309
Group1618:	contig_4313
Group1619:	contig_4316	contig_16340
Group1620:	contig_4323	contig_47716
Group1621:	contig_4327
Group1622:	contig_4329	contig_23057
Group1623:	contig_4334	contig_19450	contig_56945
Group1624:	contig_4343	contig_8046	contig_43980
Group1625:	contig_4348
Group1626:	contig_4351
Group1627:	contig_4358
Group1628:	contig_4359
Group1629:	contig_4361
Group1630:	contig_4362	contig_38166
Group1631:	contig_4364
Group1632:	contig_4366
Group1633:	contig_4368
Group1634:	contig_4369
Group1635:	contig_4370
Group1636:	contig_4373
Group1637:	contig_4374	contig_43037
Group1638:	contig_4376	contig_9128	contig_9847	contig_18581
Group1639:	contig_4379	contig_15770	contig_15906
Group1640:	contig_4382
Group1641:	contig_4384
Group1642:	contig_4385
Group1643:	contig_4392	contig_7716	contig_9992
Group1644:	contig_4394
Group1645:	contig_4396	contig_9199	contig_34534	contig_34633
Group1646:	contig_4401
Group1647:	contig_4402
Group1648:	contig_4403	contig_16708
Group1649:	contig_4405	contig_25005
Group1650:	contig_4406
Group1651:	contig_4408
Group1652:	contig_4409
Group1653:	contig_4416
Group1654:	contig_4418	contig_21158	contig_37535
Group1655:	contig_4422	contig_60487
Group1656:	contig_4423	contig_15936
Group1657:	contig_4427
Group1658:	contig_4439
Group1659:	contig_4441	contig_9093	contig_21950	contig_24739
Group1660:	contig_4449
Group1661:	contig_4454
Group1662:	contig_4455
Group1663:	contig_4456
Group1665:	contig_4458
Group1666:	contig_4459
Group1668:	contig_4465
Group1669:	contig_4467	contig_21007
Group1670:	contig_4471	contig_39149
Group1671:	contig_4472
Group1672:	contig_4473
Group1673:	contig_4475	contig_34738	contig_60891
Group1674:	contig_4478
Group1675:	contig_4480
Group1676:	contig_4481	contig_30195
Group1677:	contig_4482
Group1678:	contig_4493
Group1679:	contig_4496
Group1680:	contig_4497	contig_13065	contig_17300	contig_61373
Group1681:	contig_4504
Group1682:	contig_4506
Group1683:	contig_4517
Group1684:	contig_4521
Group1685:	contig_4524	contig_30796
Group1686:	contig_4527
Group1688:	contig_4539
Group1689:	contig_4540	contig_4660	contig_7303	contig_7984	contig_9091	contig_11841	contig_61495
Group1690:	contig_4542
Group1691:	contig_4553
Group1692:	contig_4556	contig_39929	contig_40237
Group1693:	contig_4557
Group1694:	contig_4558	contig_57297
Group1695:	contig_4561
Group1696:	contig_4568	contig_55850
Group1697:	contig_4573	contig_6814
Group1698:	contig_4575
Group1699:	contig_4580
Group1700:	contig_4581
Group1701:	contig_4586
Group1702:	contig_4587	contig_18041
Group1703:	contig_4589	contig_22099
Group1704:	contig_4592
Group1705:	contig_4596
Group1706:	contig_4598
Group1707:	contig_4605
Group1708:	contig_4608	contig_47594
Group1709:	contig_4610	contig_47655	contig_52236
Group1710:	contig_4617	contig_9641	contig_59157
Group1711:	contig_4620
Group1712:	contig_4621
Group1713:	contig_4625	contig_34629
Group1714:	contig_4628
Group1715:	contig_4629	contig_30164
Group1716:	contig_4633
Group1717:	contig_4634
Group1718:	contig_4636	contig_39744	contig_45550
Group1719:	contig_4637	contig_56578
Group1720:	contig_4642	contig_40590
Group1722:	contig_4646
Group1723:	contig_4650	contig_28706	contig_56057
Group1724:	contig_4654
Group1725:	contig_4656	contig_12619	contig_27785	contig_33704	contig_56543
Group1727:	contig_4664	contig_38519
Group1728:	contig_4672
Group1729:	contig_4675	contig_60184	contig_60201
Group1730:	contig_4678	contig_46530	contig_49935	contig_50774	contig_57162
Group1731:	contig_4680	contig_32647
Group1732:	contig_4687	contig_12078
Group1733:	contig_4688
Group1734:	contig_4695
Group1735:	contig_4696
Group1736:	contig_4698
Group1737:	contig_4701
Group1738:	contig_4703
Group1740:	contig_4708
Group1741:	contig_4709	contig_31062
Group1742:	contig_4719
Group1743:	contig_4720
Group1744:	contig_4722	contig_28402
Group1745:	contig_4726
Group1747:	contig_4731	contig_25800	contig_41118
Group1748:	contig_4732	contig_11307
Group1750:	contig_4734	contig_18412
Group1751:	contig_4738	contig_47491
Group1752:	contig_4739	contig_39615
Group1753:	contig_4740
Group1754:	contig_4744
Group1755:	contig_4745
Group1756:	contig_4750
Group1757:	contig_4757
Group1758:	contig_4758
Group1759:	contig_4759
Group1760:	contig_4760
Group1761:	contig_4764	contig_17403
Group1762:	contig_4765	contig_21530
Group1763:	contig_4768	contig_15600
Group1764:	contig_4771
Group1766:	contig_4779
Group1767:	contig_4780
Group1769:	contig_4797
Group1770:	contig_4800	contig_43486	contig_56153
Group1771:	contig_4802
Group1772:	contig_4803
Group1773:	contig_4807	contig_40917
Group1774:	contig_4809
Group1775:	contig_4811
Group1776:	contig_4813
Group1777:	contig_4819
Group1778:	contig_4822	contig_45544
Group1780:	contig_4829	contig_26777	contig_34275
Group1781:	contig_4833
Group1782:	contig_4835
Group1783:	contig_4842	contig_24281
Group1784:	contig_4846	contig_6746	contig_7661	contig_14790	contig_20384	contig_21869	contig_40009	contig_40010	contig_61640
Group1785:	contig_4854
Group1786:	contig_4857
Group1787:	contig_4859	contig_11629
Group1788:	contig_4866	contig_33073
Group1789:	contig_4872
Group1790:	contig_4875	contig_14902	contig_60848
Group1791:	contig_4877	contig_5592	contig_49843
Group1792:	contig_4880	contig_10147
Group1793:	contig_4884	contig_35093	contig_35377
Group1794:	contig_4886	contig_15265	contig_47494	contig_56991
Group1795:	contig_4888
Group1796:	contig_4895	contig_55265
Group1797:	contig_4904
Group1798:	contig_4906
Group1799:	contig_4907
Group1800:	contig_4909
Group1801:	contig_4910	contig_52665
Group1802:	contig_4912	contig_38795
Group1803:	contig_4918
Group1804:	contig_4919
Group1805:	contig_4921	contig_6582	contig_34403	contig_61835
Group1806:	contig_4922
Group1807:	contig_4923	contig_16609	contig_17976
Group1808:	contig_4924
Group1809:	contig_4925
Group1810:	contig_4928
Group1811:	contig_4929	contig_13284
Group1812:	contig_4930
Group1813:	contig_4931
Group1814:	contig_4938	contig_5818
Group1817:	contig_4942
Group1818:	contig_4943
Group1819:	contig_4948
Group1820:	contig_4949	contig_7437
Group1821:	contig_4954
Group1822:	contig_4965
Group1823:	contig_4970
Group1824:	contig_4971
Group1825:	contig_4974
Group1826:	contig_4976	contig_35499
Group1827:	contig_4979
Group1828:	contig_4980
Group1829:	contig_4984	contig_19289	contig_44947
Group1830:	contig_4985
Group1831:	contig_4986
Group1832:	contig_4987
Group1834:	contig_5004
Group1835:	contig_5006	contig_11457	contig_21240	contig_30021
Group1836:	contig_5011
Group1837:	contig_5012	contig_12388	contig_22912
Group1838:	contig_5018
Group1839:	contig_5019
Group1840:	contig_5020
Group1841:	contig_5028	contig_22972
Group1842:	contig_5029	contig_40516	contig_49423
Group1843:	contig_5030
Group1844:	contig_5039	contig_22368
Group1845:	contig_5043
Group1846:	contig_5045	contig_9723	contig_10954	contig_49217
Group1847:	contig_5046	contig_5659
Group1848:	contig_5050
Group1849:	contig_5051	contig_9559
Group1850:	contig_5053
Group1851:	contig_5055
Group1852:	contig_5061
Group1853:	contig_5062	contig_41609
Group1854:	contig_5063	contig_33996
Group1856:	contig_5069
Group1857:	contig_5070
Group1858:	contig_5072
Group1859:	contig_5073
Group1860:	contig_5074
Group1861:	contig_5075	contig_7288	contig_57284
Group1862:	contig_5077
Group1863:	contig_5080	contig_38843
Group1864:	contig_5084
Group1865:	contig_5085	contig_6540
Group1866:	contig_5090
Group1867:	contig_5091	contig_18279
Group1868:	contig_5094
Group1869:	contig_5096	contig_16837	contig_17875
Group1870:	contig_5098
Group1871:	contig_5102
Group1872:	contig_5103	contig_9515	contig_25282	contig_32313	contig_34046	contig_59126
Group1873:	contig_5105	contig_8899
Group1874:	contig_5110
Group1875:	contig_5112
Group1876:	contig_5116
Group1877:	contig_5118
Group1878:	contig_5125	contig_13357	contig_17284
Group1881:	contig_5134
Group1882:	contig_5135	contig_54784
Group1883:	contig_5137
Group1884:	contig_5142
Group1885:	contig_5145	contig_51547
Group1886:	contig_5155	contig_19358	contig_29122
Group1887:	contig_5160
Group1888:	contig_5162
Group1889:	contig_5164
Group1890:	contig_5167	contig_21748
Group1891:	contig_5168
Group1892:	contig_5179
Group1893:	contig_5189	contig_24050
Group1894:	contig_5190	contig_7059
Group1895:	contig_5196
Group1896:	contig_5197
Group1897:	contig_5210
Group1898:	contig_5213
Group1899:	contig_5216	contig_56685
Group1900:	contig_5218
Group1902:	contig_5224	contig_6476
Group1904:	contig_5230	contig_17294
Group1905:	contig_5233	contig_59476
Group1906:	contig_5234
Group1907:	contig_5239
Group1908:	contig_5240	contig_21639	contig_47538
Group1909:	contig_5244	contig_9342
Group1910:	contig_5245
Group1911:	contig_5251
Group1912:	contig_5263
Group1913:	contig_5264
Group1914:	contig_5268
Group1915:	contig_5271
Group1917:	contig_5282	contig_30451
Group1918:	contig_5283
Group1919:	contig_5291
Group1920:	contig_5296
Group1921:	contig_5298
Group1922:	contig_5299
Group1923:	contig_5300
Group1924:	contig_5303	contig_9965
Group1925:	contig_5314
Group1926:	contig_5316
Group1927:	contig_5320	contig_30962
Group1928:	contig_5322
Group1929:	contig_5323	contig_29111
Group1930:	contig_5327
Group1931:	contig_5329
Group1932:	contig_5330
Group1933:	contig_5333
Group1934:	contig_5338
Group1935:	contig_5342
Group1936:	contig_5347
Group1937:	contig_5349
Group1938:	contig_5350
Group1939:	contig_5352	contig_41006
Group1940:	contig_5353
Group1941:	contig_5360	contig_8722
Group1942:	contig_5363
Group1945:	contig_5375
Group1946:	contig_5377
Group1947:	contig_5379
Group1948:	contig_5381
Group1949:	contig_5387	contig_6637	contig_9180	contig_24006	contig_29868
Group1950:	contig_5388
Group1951:	contig_5392
Group1952:	contig_5395
Group1953:	contig_5396
Group1956:	contig_5417
Group1957:	contig_5422
Group1958:	contig_5423	contig_57360
Group1959:	contig_5424
Group1960:	contig_5428	contig_38610
Group1961:	contig_5433
Group1962:	contig_5434
Group1963:	contig_5438
Group1964:	contig_5444
Group1965:	contig_5454
Group1966:	contig_5462
Group1967:	contig_5467	contig_9570	contig_10142	contig_10243	contig_18951	contig_21606	contig_26336	contig_26351	contig_26354	contig_26358	contig_31272	contig_50481	contig_57541
Group1968:	contig_5469
Group1969:	contig_5474
Group1970:	contig_5476
Group1971:	contig_5479
Group1972:	contig_5486	contig_47699
Group1973:	contig_5492
Group1974:	contig_5496
Group1975:	contig_5497
Group1977:	contig_5510	contig_20159
Group1978:	contig_5511	contig_30872	contig_52036
Group1979:	contig_5512
Group1980:	contig_5513	contig_5732	contig_47067
Group1981:	contig_5515
Group1982:	contig_5517
Group1983:	contig_5519	contig_21520
Group1984:	contig_5525
Group1985:	contig_5528	contig_52826
Group1986:	contig_5530	contig_13931
Group1987:	contig_5539
Group1988:	contig_5540
Group1989:	contig_5550
Group1990:	contig_5558
Group1991:	contig_5560
Group1992:	contig_5561
Group1993:	contig_5562
Group1994:	contig_5567	contig_36525	contig_53271
Group1995:	contig_5568
Group1996:	contig_5572
Group1997:	contig_5579
Group1998:	contig_5581	contig_39133
Group1999:	contig_5583
Group2000:	contig_5585
Group2001:	contig_5586
Group2003:	contig_5596	contig_34318
Group2004:	contig_5597	contig_9052	contig_30956	contig_39660	contig_39661
Group2005:	contig_5603
Group2006:	contig_5610	contig_48404
Group2007:	contig_5615	contig_8121	contig_19762	contig_42914	contig_44963
Group2008:	contig_5616
Group2009:	contig_5617
Group2011:	contig_5624
Group2012:	contig_5626
Group2013:	contig_5630
Group2014:	contig_5632	contig_24918
Group2015:	contig_5633
Group2016:	contig_5635
Group2017:	contig_5639	contig_13676	contig_20856	contig_34932	contig_54756
Group2019:	contig_5652
Group2020:	contig_5654
Group2021:	contig_5657	contig_32103
Group2023:	contig_5660
Group2024:	contig_5667
Group2025:	contig_5669
Group2026:	contig_5670	contig_8409	contig_27007
Group2027:	contig_5671
Group2028:	contig_5672	contig_14139	contig_15301	contig_61119
Group2029:	contig_5682	contig_44010
Group2030:	contig_5683	contig_22385
Group2031:	contig_5687
Group2032:	contig_5688
Group2033:	contig_5690	contig_42716
Group2034:	contig_5694
Group2035:	contig_5700	contig_16222	contig_57661
Group2036:	contig_5701	contig_10852	contig_30562
Group2037:	contig_5715
Group2038:	contig_5717
Group2039:	contig_5718
Group2040:	contig_5720
Group2041:	contig_5721
Group2042:	contig_5725
Group2043:	contig_5726	contig_35478	contig_37557
Group2044:	contig_5728
Group2046:	contig_5735
Group2047:	contig_5737
Group2048:	contig_5739	contig_52354
Group2049:	contig_5741	contig_5935
Group2050:	contig_5744
Group2051:	contig_5747
Group2052:	contig_5753
Group2053:	contig_5757	contig_9950	contig_22090	contig_61187
Group2054:	contig_5759
Group2055:	contig_5762
Group2056:	contig_5763
Group2057:	contig_5765	contig_19760
Group2058:	contig_5766
Group2059:	contig_5768
Group2060:	contig_5774
Group2061:	contig_5776
Group2062:	contig_5779	contig_23499
Group2063:	contig_5783
Group2064:	contig_5789	contig_16713
Group2065:	contig_5792
Group2066:	contig_5794
Group2067:	contig_5800	contig_57454
Group2068:	contig_5801
Group2069:	contig_5804	contig_50070
Group2070:	contig_5816	contig_24300
Group2073:	contig_5821
Group2074:	contig_5822	contig_43967
Group2075:	contig_5827	contig_30293	contig_57304
Group2076:	contig_5832
Group2077:	contig_5835
[truncated: 22,573 more rows]
[truncated: 5 more columns]
