# Supplementary material for: De Novo Transcriptome Sequencing and Analysis for Venturia inaequalis, the Devastating Apple Scab Pathogen
Source: PLoS One. 2013 Jan 17;8(1):e53937. doi: 10.1371/journal.pone.0053937 (PMC3547962; doi:10.1371/journal.pone.0053937)
Supplement: File S12 — Cell wall degrading enzymes predicted in transcriptome of V. inaequalis. (XLS) [file pone.0053937.s012.xls]

## Sheet: Sheet1
Table S12: Cell wall degrading enzymes predicted in transcriptome of V.inaequalis
GH Family	No. of enzymes	Enzymes
GH3	22	β-glucosidase	β-glucosidase
GH28	19	polygalacturonase (EC 3.2.1.15); exo-polygalacturonase (EC 3.2.1.67); exo-polygalacturonosidase (EC 3.2.1.82); rhamnogalacturonase (EC 3.2.1.171); endo-xylogalacturonan hydrolase (EC 3.2.1.-); rhamnogalacturonan a-L-rhamnopyranohydrolase (EC 3.2.1.40)	polygalacturonase (EC 3.2.1.15); exo-polygalacturonase (EC 3.2.1.67); exo-polygalacturonosidase (EC 3.2.1.82); rhamnogalacturonase (EC 3.2.1.171); endo-xylogalacturonan hydrolase (EC 3.2.1.-); rhamnogalacturonan a-L-rhamnopyranohydrolase (EC 3.2.1.40)
GH47	17	a-mannosidase (EC 3.2.1.113)	a-mannosidase (EC 3.2.1.113)
GH16	16	endo-1,3-b-glucanase,endo-1,3(4)-b-glucanase, xyloglucanase, endo-b-1,3-galactanase	endo-1,3-b-glucanase,endo-1,3(4)-b-glucanase, xyloglucanase, endo-b-1,3-galactanase
GH31	16	a-glucosidase (EC 3.2.1.20); a-1,3-glucosidase (EC 3.2.1.84); sucrase-isomaltase (EC 3.2.1.48) (EC 3.2.1.10); a-xylosidase (EC 3.2.1.177); a-glucan lyase (EC 4.2.2.13); isomaltosyltransferase (EC 2.4.1.-).	a-glucosidase (EC 3.2.1.20); a-1,3-glucosidase (EC 3.2.1.84); sucrase-isomaltase (EC 3.2.1.48) (EC 3.2.1.10); a-xylosidase (EC 3.2.1.177); a-glucan lyase (EC 4.2.2.13); isomaltosyltransferase (EC 2.4.1.-).
GH1	15	b-glucosidase (EC 3.2.1.21); b-galactosidase (EC 3.2.1.23); b-mannosidase (EC 3.2.1.25); b-glucuronidase (EC 3.2.1.31); b-D-fucosidase (EC 3.2.1.38); phlorizin hydrolase (EC 3.2.1.62); exo-b-1,4-glucanase (EC 3.2.1.74); 6-phospho-b-galactosidase (EC 3.2.1.85); 6-phospho-b-glucosidase (EC 3.2.1.86); strictosidine b-glucosidase (EC 3.2.1.105); lactase (EC 3.2.1.108); amygdalin b-glucosidase (EC 3.2…	b-glucosidase (EC 3.2.1.21); b-galactosidase (EC 3.2.1.23); b-mannosidase (EC 3.2.1.25); b-glucuronidase (EC 3.2.1.31); b-D-fucosidase (EC 3.2.1.38); phlorizin hydrolase (EC 3.2.1.62); exo-b-1,4-glucanase (EC 3.2.1.74); 6-phospho-b-galactosidase (EC 3.2.1.85); 6-phospho-b-glucosidase (EC 3.2.1.86); strictosidine b-glucosidase (EC 3.2.1.105); lactase (EC 3.2.1.108); amygdalin b-glucosidase (EC 3.2…
GH35	15	b-galactosidase (EC 3.2.1.23); exo-b-glucosaminidase (EC 3.2.1.165); exo-b-1,4-galactanase (EC 3.2.1.-)	b-galactosidase (EC 3.2.1.23); exo-b-glucosaminidase (EC 3.2.1.165); exo-b-1,4-galactanase (EC 3.2.1.-)
GH5	11	chitosanase (EC 3.2.1.132); b-mannosidase (EC 3.2.1.25); cellulase (EC 3.2.1.4); glucan b-1,3-glucosidase (EC 3.2.1.58); licheninase (EC 3.2.1.73); glucan endo-1,6-b-glucosidase (EC 3.2.1.75); mannan endo-b-1,4-mannosidase (EC 3.2.1.78); endo-b-1,4-xylanase (EC 3.2.1.8); cellulose b-1,4-cellobiosidase (EC 3.2.1.91); b-1,3-mannanase (EC 3.2.1.-); xyloglucan-specific endo-b-1,4-glucanase (EC 3.2.1.…	chitosanase (EC 3.2.1.132); b-mannosidase (EC 3.2.1.25); cellulase (EC 3.2.1.4); glucan b-1,3-glucosidase (EC 3.2.1.58); licheninase (EC 3.2.1.73); glucan endo-1,6-b-glucosidase (EC 3.2.1.75); mannan endo-b-1,4-mannosidase (EC 3.2.1.78); endo-b-1,4-xylanase (EC 3.2.1.8); cellulose b-1,4-cellobiosidase (EC 3.2.1.91); b-1,3-mannanase (EC 3.2.1.-); xyloglucan-specific endo-b-1,4-glucanase (EC 3.2.1.…
GH17	11	glucan endo-1,3-b-glucosidase (EC 3.2.1.39); glucan 1,3-b-glucosidase (EC 3.2.1.58); licheninase (EC 3.2.1.73); b-1,3-glucanosyltransglycosylase (EC 2.4.1.-).	glucan endo-1,3-b-glucosidase (EC 3.2.1.39); glucan 1,3-b-glucosidase (EC 3.2.1.58); licheninase (EC 3.2.1.73); b-1,3-glucanosyltransglycosylase (EC 2.4.1.-).
GH61	10	copper-dependent polysaccharide monooxygenases (The enzymes in this family were originally classified as a glycoside hydrolase family based on measurement of very weak endo-1,4-b-D-glucanase activity in one family member. The structure and mode of action of these enzymes are certainly non-canonical and they cannot be considered as bona fide glycosidases. However, they are kept in the CAZy classif…	copper-dependent polysaccharide monooxygenases (The enzymes in this family were originally classified as a glycoside hydrolase family based on measurement of very weak endo-1,4-b-D-glucanase activity in one family member. The structure and mode of action of these enzymes are certainly non-canonical and they cannot be considered as bona fide glycosidases. However, they are kept in the CAZy classif…
GH38	8	a-mannosidase (EC 3.2.1.24) ; mannosyl-oligosaccharide a-1,3-1,6-mannosidase (EC 3.2.1.114); mannosyl-oligosaccharide a-1,3-mannosidase (EC 3.2.1.-)	a-mannosidase (EC 3.2.1.24) ; mannosyl-oligosaccharide a-1,3-1,6-mannosidase (EC 3.2.1.114); mannosyl-oligosaccharide a-1,3-mannosidase (EC 3.2.1.-)
GH43	8	b-xylosidase (EC 3.2.1.37); b-1,3-xylosidase (EC 3.2.1.-); a-L-arabinofuranosidase (EC 3.2.1.55); arabinanase (EC 3.2.1.99); xylanase (EC 3.2.1.8); galactan 1,3-b-galactosidase (EC 3.2.1.145)	b-xylosidase (EC 3.2.1.37); b-1,3-xylosidase (EC 3.2.1.-); a-L-arabinofuranosidase (EC 3.2.1.55); arabinanase (EC 3.2.1.99); xylanase (EC 3.2.1.8); galactan 1,3-b-galactosidase (EC 3.2.1.145)
GH63	8	processing a-glucosidase (EC 3.2.1.106); a-1,3-glucosidase (EC 3.2.1.84); a-glucosidase (EC 3.2.1.20)	processing a-glucosidase (EC 3.2.1.106); a-1,3-glucosidase (EC 3.2.1.84); a-glucosidase (EC 3.2.1.20)
GH18	7	chitinase (EC 3.2.1.14); endo-b-N-acetylglucosaminidase (EC 3.2.1.96); xylanase inhibitor; concanavalin B; narbonin	chitinase (EC 3.2.1.14); endo-b-N-acetylglucosaminidase (EC 3.2.1.96); xylanase inhibitor; concanavalin B; narbonin
GH72	7	b-1,3-glucanosyltransglycosylase (EC 2.4.1.-)	b-1,3-glucanosyltransglycosylase (EC 2.4.1.-)
GH76	6	a-1,6-mannanase (EC 3.2.1.101)	a-1,6-mannanase (EC 3.2.1.101)
GH81	5	endo-b-1,3-glucanase (EC 3.2.1.39)	endo-b-1,3-glucanase (EC 3.2.1.39)
GH20	4	b-hexosaminidase (EC 3.2.1.52); lacto-N-biosidase (EC 3.2.1.140); b-1,6-N-acetylglucosaminidase) (EC 3.2.1.-); b-6-SO3-N-acetylglucosaminidase (EC 3.2.1.-)	b-hexosaminidase (EC 3.2.1.52); lacto-N-biosidase (EC 3.2.1.140); b-1,6-N-acetylglucosaminidase) (EC 3.2.1.-); b-6-SO3-N-acetylglucosaminidase (EC 3.2.1.-)
GH7	3	endo-b-1,4-glucanase (EC 3.2.1.4); reducing end-acting cellobiohydrolase (EC 3.2.1.176); chitosanase (EC 3.2.1.132); endo-b-1,3-1,4-glucanase (EC 3.2.1.73)	endo-b-1,4-glucanase (EC 3.2.1.4); reducing end-acting cellobiohydrolase (EC 3.2.1.176); chitosanase (EC 3.2.1.132); endo-b-1,3-1,4-glucanase (EC 3.2.1.73)
GH15	3	glucoamylase (EC 3.2.1.3); glucodextranase (EC 3.2.1.70); a,a-trehalase (EC 3.2.1.28)	glucoamylase (EC 3.2.1.3); glucodextranase (EC 3.2.1.70); a,a-trehalase (EC 3.2.1.28)
GH77	3	amylomaltase or 4-a-glucanotransferase (EC 2.4.1.25)	amylomaltase or 4-a-glucanotransferase (EC 2.4.1.25)
GH88	3	d-4,5-unsaturated b-glucuronyl hydrolase (EC 3.2.1.-)	d-4,5-unsaturated b-glucuronyl hydrolase (EC 3.2.1.-)
GH92	3	mannosyl-oligosaccharide a-1,2-mannosidase (EC 3.2.1.113); mannosyl-oligosaccharide a-1,3-mannosidase (EC 3.2.1.-); mannosyl-oligosaccharide a-1,6-mannosidase (EC 3.2.1.-); a-mannosidase (EC 3.2.1.24); a-1,2-mannosidase (EC 3.2.1.-); a-1,3-mannosidase (EC 3.2.1.-); a-1,4-mannosidase (EC 3.2.1.-)	mannosyl-oligosaccharide a-1,2-mannosidase (EC 3.2.1.113); mannosyl-oligosaccharide a-1,3-mannosidase (EC 3.2.1.-); mannosyl-oligosaccharide a-1,6-mannosidase (EC 3.2.1.-); a-mannosidase (EC 3.2.1.24); a-1,2-mannosidase (EC 3.2.1.-); a-1,3-mannosidase (EC 3.2.1.-); a-1,4-mannosidase (EC 3.2.1.-)
GH2	2	b-galactosidase (EC 3.2.1.23) ; b-mannosidase (EC 3.2.1.25); b-glucuronidase (EC 3.2.1.31); mannosylglycoprotein endo-b-mannosidase (EC 3.2.1.152); exo-b-glucosaminidase (EC 3.2.1.165)	b-galactosidase (EC 3.2.1.23) ; b-mannosidase (EC 3.2.1.25); b-glucuronidase (EC 3.2.1.31); mannosylglycoprotein endo-b-mannosidase (EC 3.2.1.152); exo-b-glucosaminidase (EC 3.2.1.165)
GH6	2	endoglucanase (EC 3.2.1.4); cellobiohydrolase (EC 3.2.1.91)	endoglucanase (EC 3.2.1.4); cellobiohydrolase (EC 3.2.1.91)
GH27	2	a-galactosidase (EC 3.2.1.22); a-N-acetylgalactosaminidase (EC 3.2.1.49); isomalto-dextranase (EC 3.2.1.94); b-L-arabinopyranosidase (EC 3.2.1.88	a-galactosidase (EC 3.2.1.22); a-N-acetylgalactosaminidase (EC 3.2.1.49); isomalto-dextranase (EC 3.2.1.94); b-L-arabinopyranosidase (EC 3.2.1.89
GH45	2	endoglucanase (EC 3.2.1.4)	endoglucanase (EC 3.2.1.4)
GH12	1	endoglucanase (EC 3.2.1.4); xyloglucan hydrolase (EC 3.2.1.151); b-1,3-1,4-glucanase (EC 3.2.1.73); xyloglucan endotransglycosylase (EC 2.4.1.207)	endoglucanase (EC 3.2.1.4); xyloglucan hydrolase (EC 3.2.1.151); b-1,3-1,4-glucanase (EC 3.2.1.73); xyloglucan endotransglycosylase (EC 2.4.1.207)
GH13	1	a-amylase (EC 3.2.1.1); pullulanase (EC 3.2.1.41); cyclomaltodextrin glucanotransferase (EC 2.4.1.19); cyclomaltodextrinase (EC 3.2.1.54); trehalose-6-phosphate hydrolase (EC 3.2.1.93); oligo-a-glucosidase (EC 3.2.1.10); maltogenic amylase (EC 3.2.1.133); neopullulanase (EC 3.2.1.135); a-glucosidase (EC 3.2.1.20); maltotetraose-forming a-amylase (EC 3.2.1.60); isoamylase (EC 3.2.1.68); glucodextr…	a-amylase (EC 3.2.1.1); pullulanase (EC 3.2.1.41); cyclomaltodextrin glucanotransferase (EC 2.4.1.19); cyclomaltodextrinase (EC 3.2.1.54); trehalose-6-phosphate hydrolase (EC 3.2.1.93); oligo-a-glucosidase (EC 3.2.1.10); maltogenic amylase (EC 3.2.1.133); neopullulanase (EC 3.2.1.135); a-glucosidase (EC 3.2.1.20); maltotetraose-forming a-amylase (EC 3.2.1.60); isoamylase (EC 3.2.1.68); glucodextr…
GH29	1	a-L-fucosidase (EC 3.2.1.51); a-1,3/1,4-L-fucosidase (EC 3.2.1.111)	a-L-fucosidase (EC 3.2.1.51); a-1,3/1,4-L-fucosidase (EC 3.2.1.111)
GH30	1	glucosylceramidase (EC 3.2.1.45); b-1,6-glucanase (EC 3.2.1.75); b-xylosidase (EC 3.2.1.37); b-fucosidase (EC 3.2.1.38); b-glucosidase (3.2.1.21); endo-b-1,6-galactanase (EC:3.2.1.164)	glucosylceramidase (EC 3.2.1.45); b-1,6-glucanase (EC 3.2.1.75); b-xylosidase (EC 3.2.1.37); b-fucosidase (EC 3.2.1.38); b-glucosidase (3.2.1.21); endo-b-1,6-galactanase (EC:3.2.1.164)
GH32	1	invertase (EC 3.2.1.26); endo-inulinase (EC 3.2.1.7); b-2,6-fructan 6-levanbiohydrolase (EC 3.2.1.64); endo-levanase (EC 3.2.1.65); exo-inulinase (EC 3.2.1.80); fructan b-(2,1)-fructosidase/1-exohydrolase (EC 3.2.1.153); fructan b-(2,6)-fructosidase/6-exohydrolase (EC 3.2.1.154); sucrose:sucrose 1-fructosyltransferase (EC 2.4.1.99); fructan:fructan 1-fructosyltransferase (EC 2.4.1.100); sucrose:f…	invertase (EC 3.2.1.26); endo-inulinase (EC 3.2.1.7); b-2,6-fructan 6-levanbiohydrolase (EC 3.2.1.64); endo-levanase (EC 3.2.1.65); exo-inulinase (EC 3.2.1.80); fructan b-(2,1)-fructosidase/1-exohydrolase (EC 3.2.1.153); fructan b-(2,6)-fructosidase/6-exohydrolase (EC 3.2.1.154); sucrose:sucrose 1-fructosyltransferase (EC 2.4.1.99); fructan:fructan 1-fructosyltransferase (EC 2.4.1.100); sucrose:f…
GH37	1	a,a-trehalase (EC 3.2.1.28)	a,a-trehalase (EC 3.2.1.28)
GH53	1	endo-b-1,4-galactanase (EC 3.2.1.89).	endo-b-1,4-galactanase (EC 3.2.1.89).
GH65	1	a,a-trehalase (EC 3.2.1.28); maltose phosphorylase (EC 2.4.1.8); trehalose phosphorylase (EC 2.4.1.64); kojibiose phosphorylase (EC 2.4.1.230); trehalose-6-phosphate phosphorylase (EC 2.4.1.-); nigerose phosphorylase (EC 2.4.1.-)	a,a-trehalase (EC 3.2.1.28); maltose phosphorylase (EC 2.4.1.8); trehalose phosphorylase (EC 2.4.1.64); kojibiose phosphorylase (EC 2.4.1.230); trehalose-6-phosphate phosphorylase (EC 2.4.1.-); nigerose phosphorylase (EC 2.4.1.-)
GH71	1	a-1,3-glucanase (EC 3.2.1.59)	a-1,3-glucanase (EC 3.2.1.59)
GH79	1	b-glucuronidase (EC 3.2.1.31); b-4-O-methyl-glucuronidase (EC 3.2.1.-); heparanase (EC 3.2.1.-); baicalin b-glucuronidase (EC 3.2.1.167)	b-glucuronidase (EC 3.2.1.31); b-4-O-methyl-glucuronidase (EC 3.2.1.-); heparanase (EC 3.2.1.-); baicalin b-glucuronidase (EC 3.2.1.167)
